# Supplementary material for: Association of C-Reactive Protein With Cardiovascular Disease Mortality According to Diabetes Status: Pooled analyses of 25,979 participants from four U.K. prospective cohort studies
Source: PubMed Central journal article supplement — Diabetes Care. 2012 Jan 16;35(2):396–403. doi: 10.2337/dc11-1588 (PMC3263864; doi:10.2337/dc11-1588), 2012-01-16
Supplement: supp_dc11-1588v111588_DC111588SupplementaryData.pdf [file supp_dc11-1588v111588_DC111588SupplementaryData.pdf]

SUPPLEMENTARY DATA

**Supplementary Table 1.** Baseline characteristics across categories of CRP according to diabetes status

| Categories for CRP                   | Overall        |                |                |         | No diabetes    |                |                |         | Diabetes       |                |                |         |
|--------------------------------------|----------------|----------------|----------------|---------|----------------|----------------|----------------|---------|----------------|----------------|----------------|---------|
|                                      | <1mg/l         | 1-3 mg/l       | >3mg/l         | p-value | <1mg/l         | 1-3 mg/l       | >3mg/l         | p-value | <1mg/l         | 1-3 mg/l       | >3mg/l         | p-value |
| N                                    | 7890           | 9421           | 8668           |         | 7708           | 8975           | 8013           |         | 182            | 446            | 655            |         |
| Median CRP ( mg/L)                   | 0.5            | 1.7            | 5.7            | N/A     | 0.5            | 1.7            | 5.7            | N/A     | 0.6            | 1.8            | 6.0            | N/A     |
| Age (years)                          | 51.4<br>(12.5) | 56.1<br>(13)   | 59<br>(13.1)   | <0.0001 | 51.2<br>(12.4) | 55.7<br>(12.9) | 58.7<br>(13.1) | <0.0001 | 62.4<br>(12.8) | 63.5<br>(11.9) | 63.3<br>(12)   | 0.54    |
| Women (%)                            | 54.1           | 49.9           | 58.6           | <0.0001 | 54.5           | 50.4           | 59.0           | <0.0001 | 34.1           | 40.1           | 54.0           | <0.0001 |
| Current smoking (%)                  | 19.4           | 24.2           | 29.2           | <0.0001 | 19.6           | 24.4           | 29.7           | <0.0001 | 13.8           | 19.1           | 22.7           | 0.02    |
| Systolic blood pressure (mm Hg)      | 129 (18)       | 136 (19)       | 139 (21)       | <0.0001 | 129 (18)       | 135 (19)       | 139 (21)       | <0.0001 | 141 (21)       | 143 (20)       | 142 (23)       | 0.70    |
| Resting heart rate (bpm)             | 69 (11)        | 70 (11)        | 73 (12)        | <0.0001 | 69 (10)        | 70 (11)        | 72 (11)        | <0.0001 | 71 (12)        | 71 (12)        | 75 (13)        | <0.0001 |
| Body mass index (kg/m <sup>2</sup> ) | 25.2<br>(3.4)  | 27.5<br>(4.2)  | 29.4<br>(5.4)  | <0.0001 | 25.2<br>(3.4)  | 27.4<br>(4.2)  | 29.2<br>(5.3)  | <0.0001 | 26.7<br>(3.6)  | 29.1<br>(4.4)  | 32 (6.1)       | <0.0001 |
| Waist circumference (cm)             | 85.5<br>(11.5) | 92.3<br>(12.5) | 96.3<br>(13.6) | <0.0001 | 85.3<br>(11.4) | 92<br>(12.4)   | 95.5<br>(13.2) | <0.0001 | 92.7<br>(11.9) | 99.3<br>(13)   | 105.6<br>(14)  | <0.0001 |
| Waist/hip ratio                      | 0.85<br>(0.08) | 0.88<br>(0.09) | 0.89<br>(0.08) | <0.0001 | 0.85<br>(0.08) | 0.88<br>(0.09) | 0.89<br>(0.08) | <0.0001 | 0.90<br>(0.08) | 0.93<br>(0.08) | 0.94<br>(0.08) | <0.0001 |
| Total cholesterol (mmol/l)           | 5.6 (1.0)      | 5.9 (1.2)      | 5.9 (1.1)      | <0.0001 | 5.6 (1.0)      | 5.9 (1.2)      | 6.0 (1.1)      | <0.0001 | 5.2 (1.0)      | 5.6 (1.0)      | 5.7 (1.1)      | <0.0001 |
| HbA1c (%)                            | 5.2 (0.5)      | 5.4 (0.7)      | 5.6 (0.9)      | <0.0001 | 5.2 (0.3)      | 5.3 (0.4)      | 5.4<br>(0.38)  | <0.0001 | 6.9 (1.1)      | 7.5 (1.5)      | 7.7 (1.6)      | <0.0001 |
| Ethnicity, Caucasians (%)            | 97.4           | 97.8           | 97.9           | 0.06    | 97.5           | 98.0           | 98.1           | 0.04    | 92.9           | 93.9           | 96.5           | 0.05    |

p-values are from the analysis of variance (ANOVA)

SUPPLEMENTARY DATA

**Supplementary Table 2.** Hazard ratio (and 95% confidence interval) for all-cause (left panel) and cardiovascular disease (right panel) mortality across levels of C-reactive protein overall and by gender and diabetes status

| Subgroup | CRP levels | All-cause mortality |                  |                  | CVD mortality    |                  |                  |
|----------|------------|---------------------|------------------|------------------|------------------|------------------|------------------|
|          |            | Overall             | No diabetes      | Diabetes         | Overall          | No diabetes      | Diabetes         |
| Overall  |            |                     |                  |                  |                  |                  |                  |
|          | <1 mg/l    | 1.00 (0.91-1.10)    | 1.00 (0.91-1.10) | 1.00 (0.73-1.38) | 1.00 (0.84-1.20) | 1.00 (0.83-1.21) | 1.00 (0.57-1.76) |
|          | 1-3 mg/l   | 1.05 (0.98-1.12)    | 1.05 (0.98-1.13) | 0.90 (0.73-1.12) | 1.31 (1.17-1.47) | 1.27 (1.12-1.44) | 1.38 (1.01-1.89) |
|          | >3 mg/l    | 1.86 (1.76-1.96)    | 1.83 (1.73-1.93) | 1.65 (1.42-1.91) | 2.49 (2.28-2.70) | 2.40 (2.19-2.63) | 2.44 (1.96-3.04) |
| Men      |            |                     |                  |                  |                  |                  |                  |
|          | <1 mg/l    | 1.00 (0.88-1.14)    | 1.00 (0.87-1.15) | 1.00 (0.67-1.49) | 1.00 (0.79-1.26) | 1.00 (0.78-1.28) | 1.00 (0.45-2.00) |
|          | 1-3 mg/l   | 1.14 (1.04-1.24)    | 1.15 (1.04-1.26) | 0.91 (0.69-1.21) | 1.26 (1.04-1.46) | 1.23 (1.04-1.46) | 1.20 (0.79-1.83) |
|          | >3 mg/l    | 2.11 (1.97-2.27)    | 2.10 (1.95-2.27) | 1.75 (1.43-2.13) | 2.69 (2.40-3.01) | 2.55 (2.25-2.89) | 2.82 (2.15-3.69) |
| Women    |            |                     |                  |                  |                  |                  |                  |
|          | <1 mg/l    | 1.00 (0.87-1.14)    | 1.00 (0.87-1.15) | 1.00 (0.59-1.69) | 1.00 (0.75-1.32) | 1.00 (0.75-1.34) | 1.00 (0.37-2.68) |
|          | 1-3 mg/l   | 0.96 (0.86-1.06)    | 0.95 (0.85-1.06) | 0.88 (0.62-1.25) | 1.40 (1.17-1.66) | 1.34 (1.11-1.61) | 1.67 (1.04-2.69) |
|          | >3 mg/l    | 1.60 (1.49-1.72)    | 1.56 (1.44-1.69) | 1.48 (1.19-1.84) | 2.25 (1.98-2.55) | 2.21 (1.94-2.53) | 1.95 (1.36-2.81) |

Cox models are stratified by cohort and adjusted for sex and age. The 95% confidence intervals are from floating absolute risk methods.

SUPPLEMENTARY DATA

**Supplementary Table 3.** Hazard ratios (and 95% confidence intervals) for 1 Standard deviation log<sub>e</sub> change in CRP levels and all-cause (left panel) and cardiovascular disease (right panel) mortality by diabetes status within subgroups of participants

| Variables                | Subgroups  | All-cause mortality |                  |       |         | Cardiovascular disease mortality |                  |       |         |
|--------------------------|------------|---------------------|------------------|-------|---------|----------------------------------|------------------|-------|---------|
|                          |            | No diabetes         | Diabetes         | p-int | p 3-way | No diabetes                      | Diabetes         | p-int | p 3-way |
| Smoking                  | Non smoker | 1.32 (1.26-1.39)    | 1.43 (1.25-1.64) | 0.23  | 0.62    | 1.36 (1.25-1.47)                 | 1.34 (1.10-1.63) | 0.90  | 0.68    |
|                          | Smokers    | 1.33 (1.24-1.44)    | 1.52 (1.18-1.95) | 0.18  |         | 1.67 (1.45-1.91)                 | 2.08 (1.32-3.30) | 0.30  |         |
| Age (years)              | ≤55        | 1.46 (1.30-1.64)    | 0.92 (0.58-1.45) | 0.07  | 0.12    | 1.63 (1.29-2.07)                 | 1.59 (0.77-3.29) | 0.92  | 0.61    |
|                          | >55        | 1.36 (1.31-1.42)    | 1.49 (1.33-1.68) | 0.09  |         | 1.46 (1.36-1.56)                 | 1.42 (1.18-1.70) | 0.84  |         |
| BMI (kg/m <sup>2</sup> ) | ≤28.6      | 1.44 (1.36-1.52)    | 1.85 (1.46-2.35) | 0.01  | 0.20    | 1.51 (1.36-1.67)                 | 1.50 (0.97-2.32) | 0.76  | 0.38    |
|                          | >28.6      | 1.38 (1.29-1.48)    | 1.38 (1.18-1.61) | 0.84  |         | 1.47 (1.31-1.65)                 | 1.29 (1.03-1.62) | 0.37  |         |
| WC (cm)                  | ≤91.1      | 1.36 (1.28-1.45)    | 1.30 (1.03-1.64) | 0.82  | 0.02    | 1.44 (1.29-1.61)                 | 1.00 (0.61-1.62) | 0.29  | 0.09    |
|                          | >91.1      | 1.37 (1.29-1.45)    | 1.46 (1.27-1.67) | 0.24  |         | 1.47 (1.34-1.62)                 | 1.39 (1.15-1.68) | 0.65  |         |
| TC (mmol/l)              | ≤5.8       | 1.39 (1.31-1.47)    | 1.60 (1.32-1.95) | 0.12  | 0.07    | 1.46 (1.31-1.63)                 | 1.05 (0.76-1.46) | 0.44  | 0.43    |
|                          | >5.8       | 1.34 (1.26-1.42)    | 1.38 (1.12-1.69) | 0.57  |         | 1.44 (1.30-1.60)                 | 1.26 (0.93-1.71) | 0.53  |         |
| SBP (mmHg)               | ≤132       | 1.39 (1.29-1.49)    | 1.58 (1.28-1.95) | 0.16  | 0.29    | 1.38 (1.22-1.56)                 | 1.60 (1.17-2.19) | 0.45  | 0.69    |

SUPPLEMENTARY DATA

|                              |                |                  |                  |      |      |  |                  |                  |      |      |
|------------------------------|----------------|------------------|------------------|------|------|--|------------------|------------------|------|------|
|                              | >132           | 1.37 (1.30-1.44) | 1.39 (1.20-1.61) | 0.76 |      |  | 1.50 (1.38-1.64) | 1.39 (1.10-1.75) | 0.44 |      |
| Physical activity (sessions) | ≤1/week        | 1.36 (1.29-1.42) | 1.58 (1.38-1.81) | 0.04 | 0.31 |  | 1.43 (1.32-1.55) | 1.36 (1.11-1.68) | 0.64 | 0.12 |
|                              | >1/week        | 1.34 (1.23-1.45) | 0.93 (0.66-1.30) | 0.05 |      |  | 1.54 (1.32-1.80) | 2.31 (1.27-4.19) | 0.17 |      |
| Ethnicity                    | Caucasians     | 1.41 (1.35-1.47) | 1.55 (1.38-1.75) | 0.06 | 0.06 |  | 1.52 (1.42-1.64) | 1.55 (1.29-1.86) | 0.78 | 0.75 |
|                              | Non Caucasians | 1.06 (0.60-1.88) | 0.30 (0.08-1.15) | 0.12 |      |  | 0.36 (0.10-1.34) | 0.40 (0.06-2.68) | 0.98 |      |
| Overall                      |                | 1.41 (1.35-1.47) | 1.53 (1.35-1.72) | 0.08 |      |  | 1.51 (1.41-1.63) | 1.54 (1.28-1.85) | 0.80 |      |

p-int, p-value for interaction for the association by diabetes status within subgroups;p 3-way, 3-ways interaction p-values for the associations across complementary subgroups. Cox models are stratified by cohort and adjusted for sex and age.
